# Supplementary material for: Vulnerability of the agricultural sector to climate change: The development of a pan-tropical Climate Risk Vulnerability Assessment to inform sub-national decision making
Source: PLoS One. 2019 Mar 27;14(3):e0213641. doi: 10.1371/journal.pone.0213641 (PMC6436735; doi:10.1371/journal.pone.0213641)
Supplement: S1 File — The MaxEnt Model [110] was used for selected crops when accurate presence data was available, or if the crop is predominantly irrigated, such is the case of Rice in Vietnam [111] or grown at particular elevational ranges, for example, coffee Arabica in Nicaragua and coffee Robusta in Vietnam. The Ecocrop model was used when geographic distribution data (presence data) was not available or reliable. The natural hazards were selected and verified by experts in Vietnam and Nicaragua. (XLSX) [file pone.0213641.s007.xlsx]

## Sheet: Vietnam
		Maize			Cassava		Cashew-nut		Coffee robusta		Rice
		Zea mays L			Manihot esculenta Crantz		Anacardium occidentale		Coffea canephora Pierre ex A.Froehner		Oryza sativa L. ssp. Japonica
Crop Model		EcoCrop			EcoCrop		EcoCrop		MaxENT		MaxEnt
Climatic parameters		Source			Source		Source		Source		Source
		FAO [1] revised			Jarvis et al [2]		FAO [1] revised		Crop Presence data [3]		Crop Presence data [4]
Growing Season Min (days per year)		120			240		190		Bioclimatic Variables [5]		Bioclimatic Variables [5]
Growing Season Max (days per year)		120			240		260
Killing Temperature (°C)		0.8			0		0
Temperature Min (°C)		5			15		5
Temperature Optimum Min (°C)		22			22		20
Temperature Optimum Max (°C)		28.6			32		30
Temperature Max (°C)		30			45		46
Rainfall Min (mm) for the growing season		70			300		400
Rainfall Optimum Min (mm) for the growing season		215			800		1500
Rainfall Optimum Max (mm) for the growing season		650			2200		2000
Rainfall Max (mm) for the growing season		935			2800		3500
Exposure variables		Main risks			Main risks		Main risks		Main risks		Main risks
Drought		✓			✓		✓		✓		✓
Soil erosion		✓			✓		✓		✓		✓
Tropical cyclones		✓									✓
Flooding		✓									✓
Sea level rise											✓
Other:
References
1. Food and Agricultural Organisation (FAO). Land and Water Development Division. EcoCrop [Internet]. 2000 [cited 12 Jan 2015]. Available: http://ecocrop.fao.org/ecocrop/srv/en/about
2. Jarvis, A., Ramirez-Villegas, J., Herrera Campo, B.V. et al. Tropical Plant Biol. (2012) 5: 9. https://doi.org/10.1007/s12042-012-9096-7
3. Monfreda C, Ramankutty N, Foley JA. Farming the planet: 2. Geographic distribution of crop areas, yields, physiological types, and net primary production in the year 2000: GLOBAL CROP AREAS AND YIELDS IN 2000. Global Biogeochemical Cycles. 2008;22: n/a-n/a. doi:10.1029/2007GB002947
4. Andrew Nelson, Murali Krishna Gumma A map of lowland rice extent in the major rice growing countries of Asia. 2015, 37p. IRRI, Los Banos, Philippines
5. Bioclimatic variables: Worldclim [Internet]. 2017 [cited 12 Nov 2017]. Available: http://www.worldclim.org/bioclim

## Sheet: Uganda
		Maize				Cassava			Beans			Sweet Potato			Plantain
		Zea mays L				Manihot esculenta Crantz			Anacardium occidentale			Oryza sativa L.ssp.Indica			Oryza sativa L. ssp. Japonica
Crop Model		EcoCrop				EcoCrop			EcoCrop			EcoCrop			EcoCrop
Climatic parameters		Source				Source			Source			Source			Source
		FAO [1] revised				Jarvis et al [2]			Yadav et al [3]			FAO [1] revised			FAO [1] revised
Growing Season Min (days per year)		120				240			90			80			365
Growing Season Max (days per year)		120				240			90			170			365
Killing Temperature (°C)		0.8				0			0			0			0
Temperature Min (°C)		5				15			13.6			15.5			15
Temperature Optimum Min (°C)		22				22			17.5			20			24
Temperature Optimum Max (°C)		28.6				32			23.1			32			27
Temperature Max (°C)		30				45			25.6			35			35
Rainfall Min (mm) for the growing season		70				300			200			100			700
Rainfall Optimum Min (mm) for the growing season		215				800			363			355			1000
Rainfall Optimum Max (mm) for the growing season		650				2200			450			406			1300
Rainfall Max (mm) for the growing season		935				2800			710			1500			5000
Exposure variables		Main risks				Main risks			Main risks			Main risks			Main risks
Drought		✓				✓			✓			✓			✓
Fire		✓				✓			✓			✓			✓
Flooding		✓				✓			✓			✓			✓
Land Degradation		✓				✓			✓			✓			✓
References
1. Food and Agricultural Organisation (FAO). Land and Water Development Division. EcoCrop [Internet]. 2000 [cited 12 Jan 2015]. Available: http://ecocrop.fao.org/ecocrop/srv/en/about
2. Jarvis, A., Ramirez-Villegas, J., Herrera Campo, B.V. et al. Tropical Plant Biol. (2012) 5: 9. https://doi.org/10.1007/s12042-012-9096-7
3. Shyam Singh Yadav, Robert Redden, Jerry L. Hatfield, Hermann Lotze-Campen, Anthony J. W. Hall. Crop Adaptation to Climate Change. John Wiley and Sons, Inc; 2011.

## Sheet: Nicaragua
		Coffee				Bean			Rice			Maize			Cocao
		Zea mays L				Manihot esculenta Crantz			Anacardium occidentale			Oryza sativa L.ssp.Indica			Oryza sativa L. ssp. Japonica
Crop Model		Maxent				Maxent			Maxent			Maxent			Maxent
Crop Information		Source				Source			Source			Source			Source
		Crop Presence data [1]				Crop Presence data [1]			Crop Presence data [1]			Crop Presence data [1]			Crop Presence data [1]
		Bioclimatic Variables [2]				Bioclimatic Variables [2]			Bioclimatic Variables [2]			Bioclimatic Variables [2]			Bioclimatic Variables [2]
Exposure variables		Main risks				Main risks			Main risks			Main risks			Main risks
Drought		✓				✓			✓			✓			✓
Fire		✓				✓			✓			✓			✓
Flooding		✓				✓			✓			✓			✓
Land Degradation		✓				✓			✓			✓			✓
References
1. The crop presense data used in the Maxent Model is from the International Centre for Tropical Agriculture and is unpuiblished
2. Bioclimatic variables: Worldclim [Internet]. 2017 [cited 12 Nov 2017]. Available: http://www.worldclim.org/bioclim
